# Supplementary material for: An international analysis of the price and affordability of beer
Source: PLOS journal article supplement (doi:10.1371/journal.pone.0208831), 2018-12-17
Supplement: S1 (10.1371/journal.pone.0208831.s001) [file journal.pone.0208831.s001]

**S1 Table. Summary statistics for beer MoL affordability in 2016**

|                         | Median | Mean | Std. Dev. | CV   |
|-------------------------|--------|------|-----------|------|
| <b>MoL</b>              |        |      |           |      |
| HICs                    | 5.7    | 5.8  | 2.8       | 0.49 |
| LMICs                   | 12.9   | 18.1 | 14.3      | 0.79 |
| LMIC as multiple of HIC | 2.3    | 3.1  |           |      |
