# Supplementary material for: An international analysis of the price and affordability of beer
Source: PLOS journal article supplement (doi:10.1371/journal.pone.0208831), 2018-12-17

**S2 Fig. Average annual percentage change in affordability (MoL) of beer, 1997-2012**

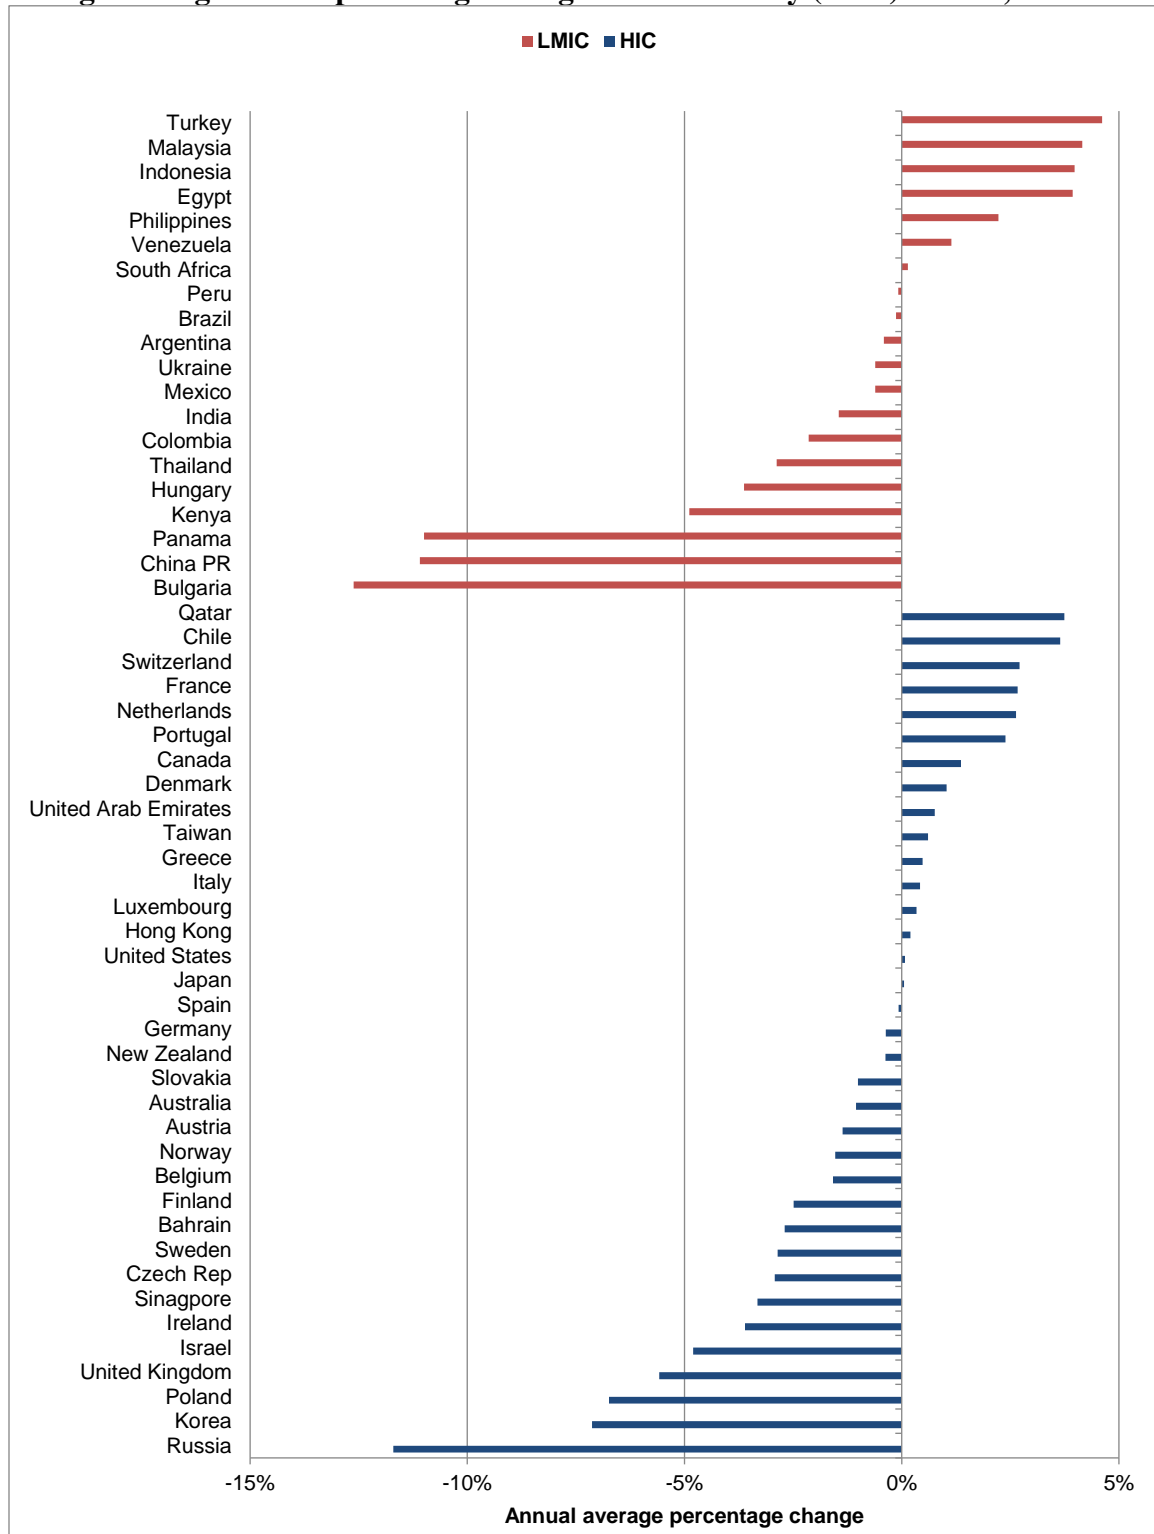

Supplement: S3 (10.1371/journal.pone.0208831.s003) [file journal.pone.0208831.s003]
